# Supplementary material for: Physician Density by Specialty Type in Urban and Rural Counties in the US, 2010 to 2017
Source: PubMed Central journal article supplement (PMC7823223; doi:10.1001/jamanetworkopen.2020.33994), 2021-01-22
Supplement: jamanetwopen-e2033994-s001.pdf [file jamanetwopen-e2033994-s001.pdf]

## Supplementary Online Content

Machado SR, Jayawardana S, Mossialos E, Vaduganathan M. Physician density by specialty type in urban and rural counties in the US, 2010 to 2017. *JAMA Network Open*. 2021;4(1):e2033994. doi:10.1001/jamanetworkopen.2020.33994

### **eMethods.** Physician Specialty Classification

This supplementary material has been provided by the authors to give readers additional information about their work.

## **eMethods. Physician Specialty Classification**

*Primary Care:* General Family Medicine, General Practice, General Internal Medicine, and General Pediatrics.

*Medical Specialties:* Allergy and Immunology, Cardiovascular Disease, Dermatology, Epidemiology, Gastroenterology, Internal Medicine, Internal Medicine Subspecialties, Pediatrics, Pediatric Subspecialties, Pediatric Cardiology, Pulmonary Disease

*Surgical Specialties:* Colon/Rectal Surgery, General Surgery, Neurological Surgery, Obstetrics Gynecology, Obstetrics Gynecology Subspecialties, Ophthalmology, Orthopedic Surgery, Otolaryngology, Plastic Surgery, Thoracic Surgery, Urology

*Other Specialties:* Aerospace Medicine, Anesthesiology, Child + Adolescent Psychiatry, Diagnostic Radiology, Emergency Medicine, Forensic Pathology, General Preventive Medicine, Medical Genetics, Neurology, Nuclear Medicine, Occupational Medicine, Psychiatry, Pathology, Anatomic/Clinical, Physical Medicine/Rehabilitation, General Preventive Medicine, Radiology, Radiation Oncology, Transplantation Surgery (part of Surgical Specialties in 2000), Vascular Medicine (part of Medical Specialties in 2000), Other Specialties, Unspecified
